# Supplementary material for: Ultrasound exfoliation of inorganic analogues of graphene
Source: PubMed Central journal article supplement (PMC4022084; doi:10.1186/1556-276x-9-167), 2014-04-05
Supplement: 1556-276X-9-167-S1.pdf [file 1556-276X-9-167-S1.pdf]

## Supplement Information

### Ultrasound Exfoliation of Inorganic Analogues of Graphene

Václav Štengl\*, Jiří Henych, Michaela Slušná

Department of Solid State Chemistry, Institute of Inorganic Chemistry AS CR v.v.i.

250 68 Řež, Czech Republic

e-mail:[stengl@iic.cas.cz](mailto:stengl@iic.cas.cz)

| <b>Table S1. Integral breath, d-spacing and crystallite size of prepared samples IAGs</b> |                                               |                                                 |                       |                         |
|-------------------------------------------------------------------------------------------|-----------------------------------------------|-------------------------------------------------|-----------------------|-------------------------|
| <b>Sample</b>                                                                             | <b>Peak Position <math>2\Theta</math> [°]</b> | <b>Integral breadth <math>2\Theta</math>[°]</b> | <b>d-spacing [nm]</b> | <b>Cryst. size [nm]</b> |
| MoS <sub>2</sub>                                                                          | 14.37                                         | 0.19                                            | 0.665                 | 826.1                   |
| MoS <sub>2</sub> _exf                                                                     | 28.34                                         | 15.11                                           | 0.313                 | 5.47                    |
| WS <sub>2</sub>                                                                           | 14.34                                         | 0.42                                            | 0.618                 | 259.0                   |
| WS <sub>2</sub> _exf                                                                      | 28.47                                         | 15.06                                           | 0.313                 | 5.99                    |
| h-BN                                                                                      | 39.54                                         | 6.95                                            | 0.349                 | 13.20                   |
| h-BN_exf                                                                                  | 28.03                                         | 14.22                                           | 0.317                 | 6.37                    |
| h-BCN                                                                                     | 26.11                                         | 4.40                                            | 0.341                 | 21.00                   |
| h-BCN_exf                                                                                 | 28.25                                         | 12.48                                           | 0.315                 | 7.33                    |
| g-C <sub>3</sub> N <sub>4</sub>                                                           | 27.48                                         | 1.63                                            | 0.324                 | 58.18                   |
| g-C <sub>3</sub> N <sub>4</sub> _exf                                                      | 28.53                                         | 15.17                                           | 0.313                 | 5.96                    |

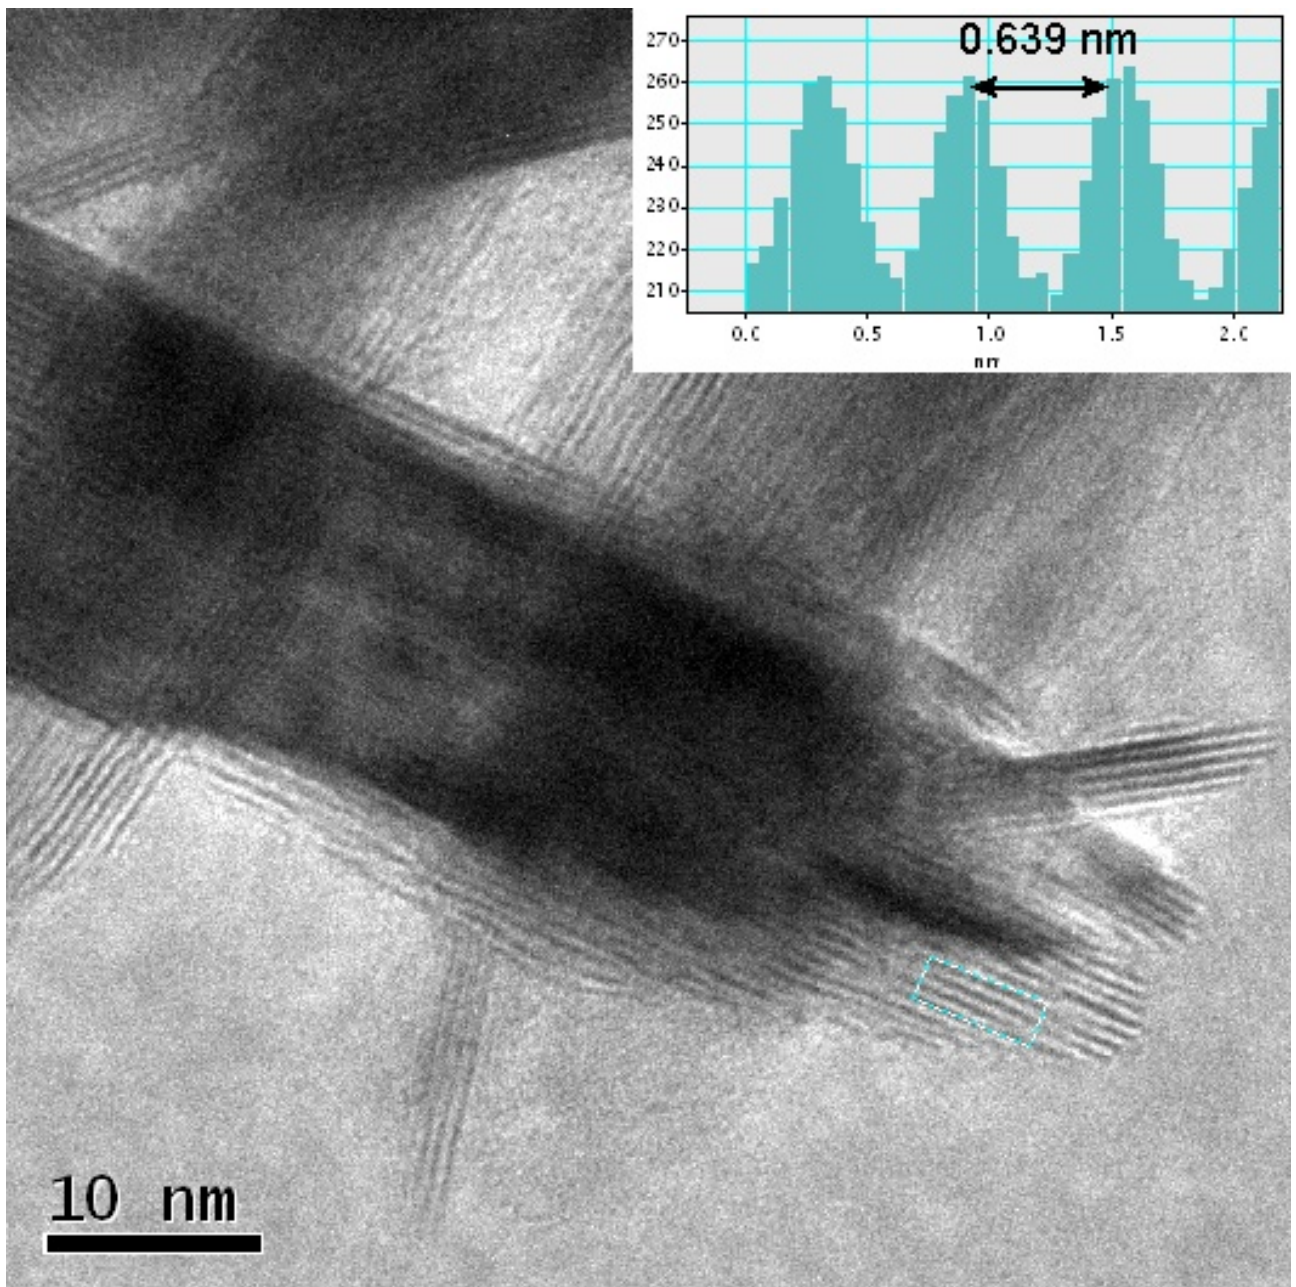

Figure S1. HRTEM of exfoliated MoS<sub>2</sub>

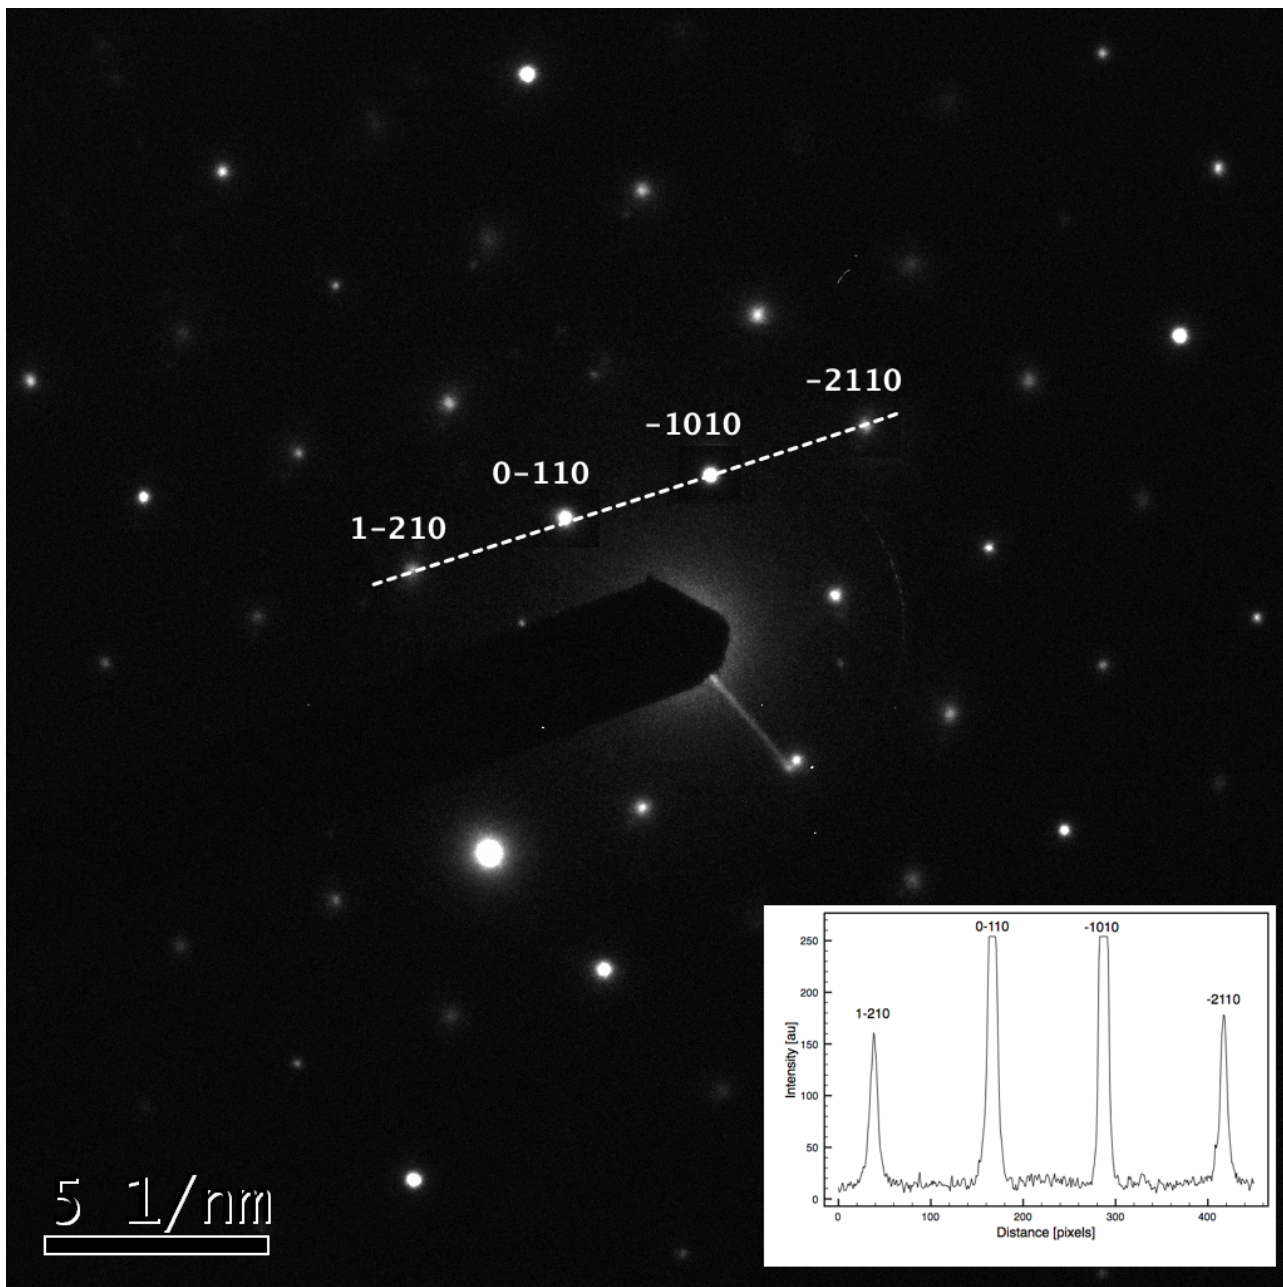

Figure S2. SAED of exfoliated MoS<sub>2</sub>



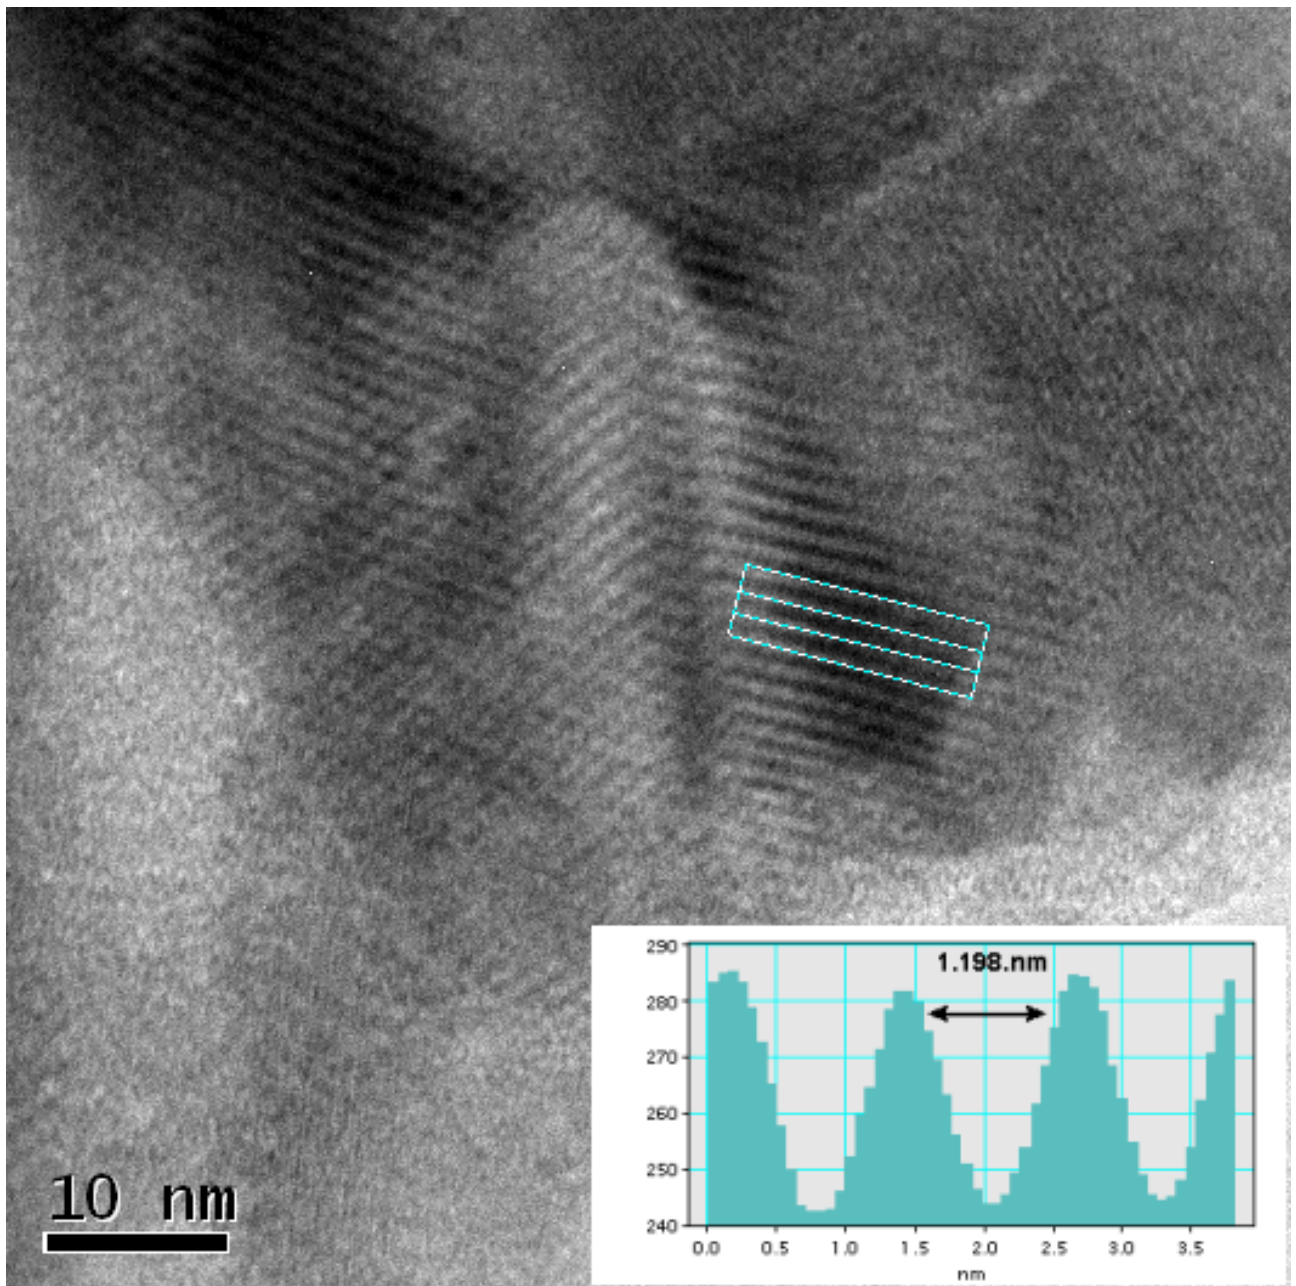

Figure S3. HRTEM of exfoliated WS<sub>2</sub>

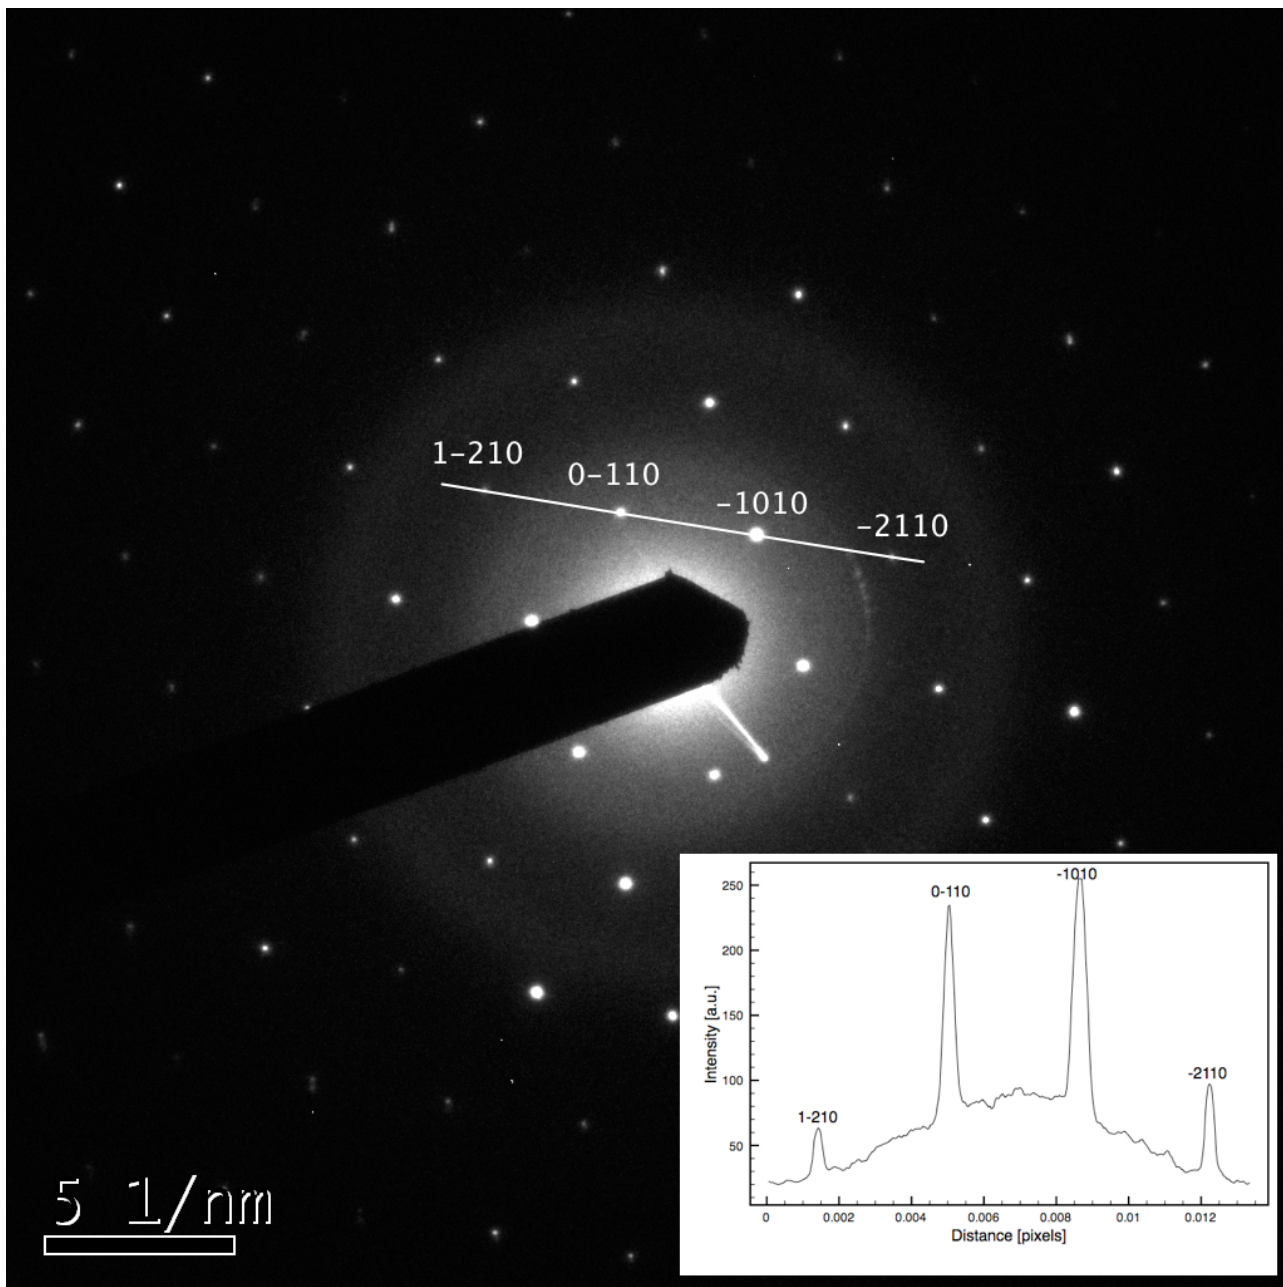

Figure S4. SAED of exfoliated WS<sub>2</sub>

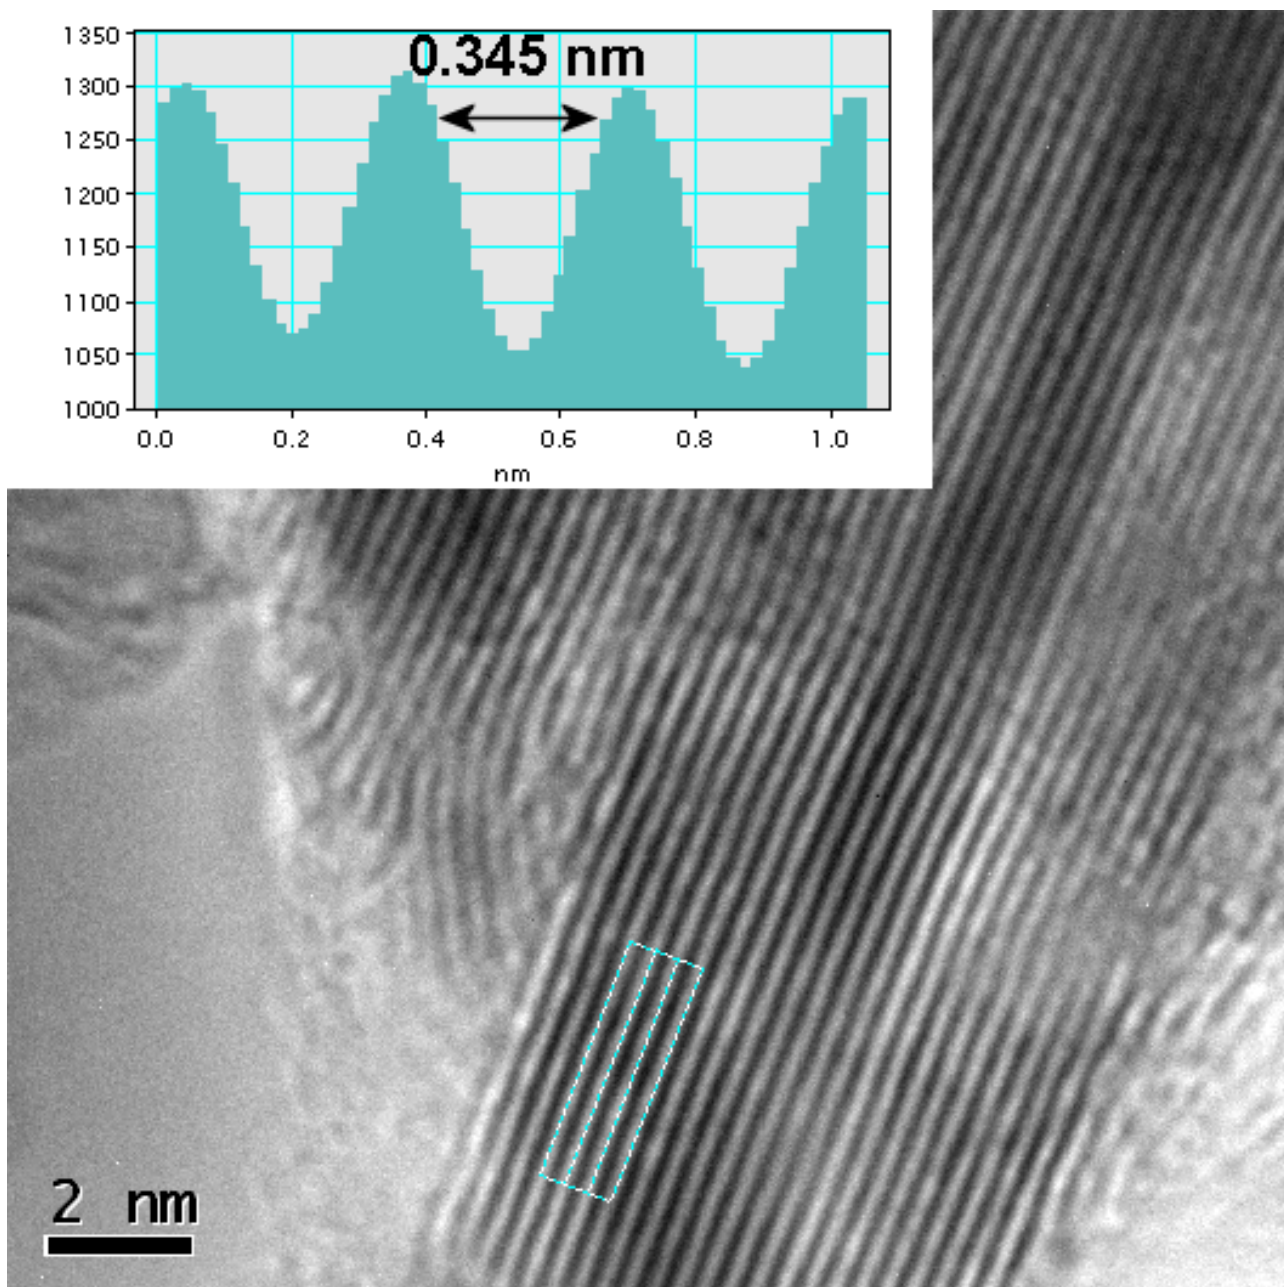

Figure S5. HRTEM of exfoliated h-BN

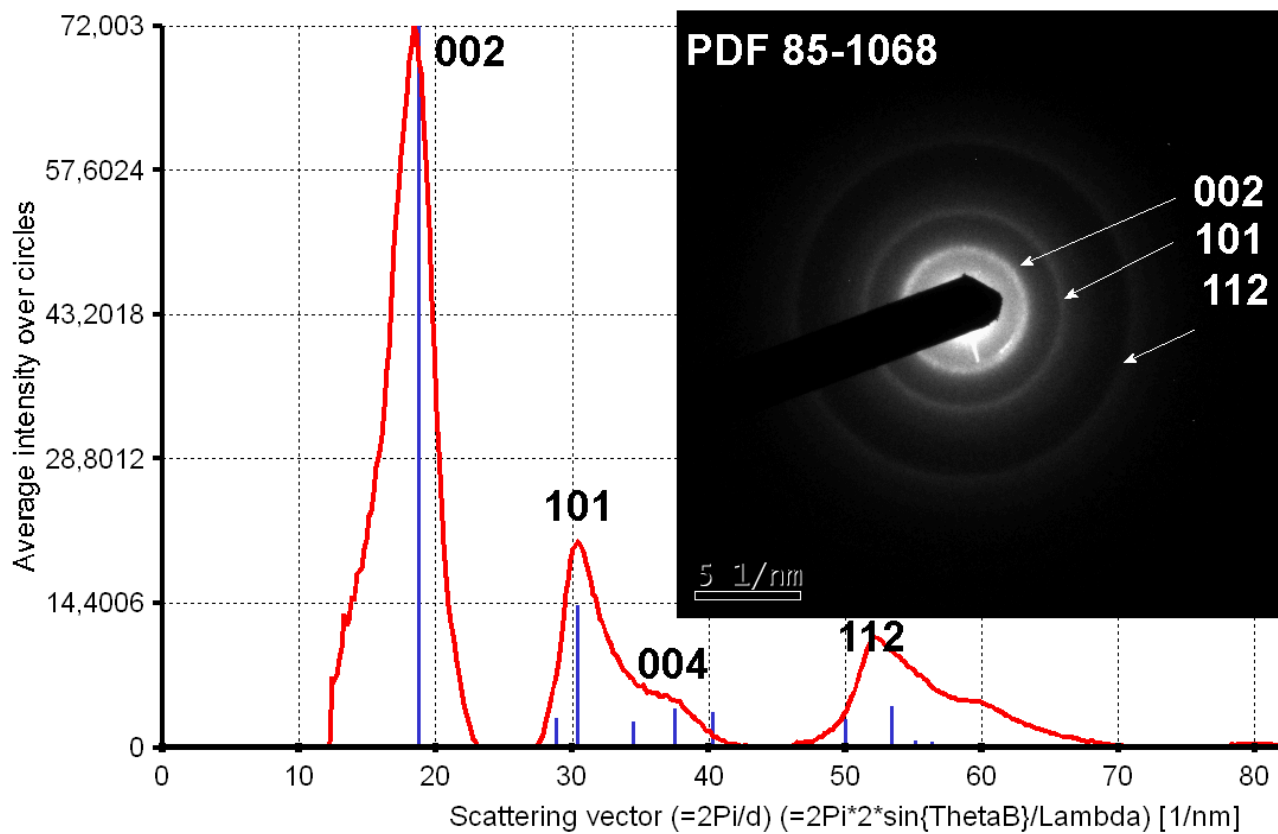

Figure S6. SAED of exfoliated h-BN



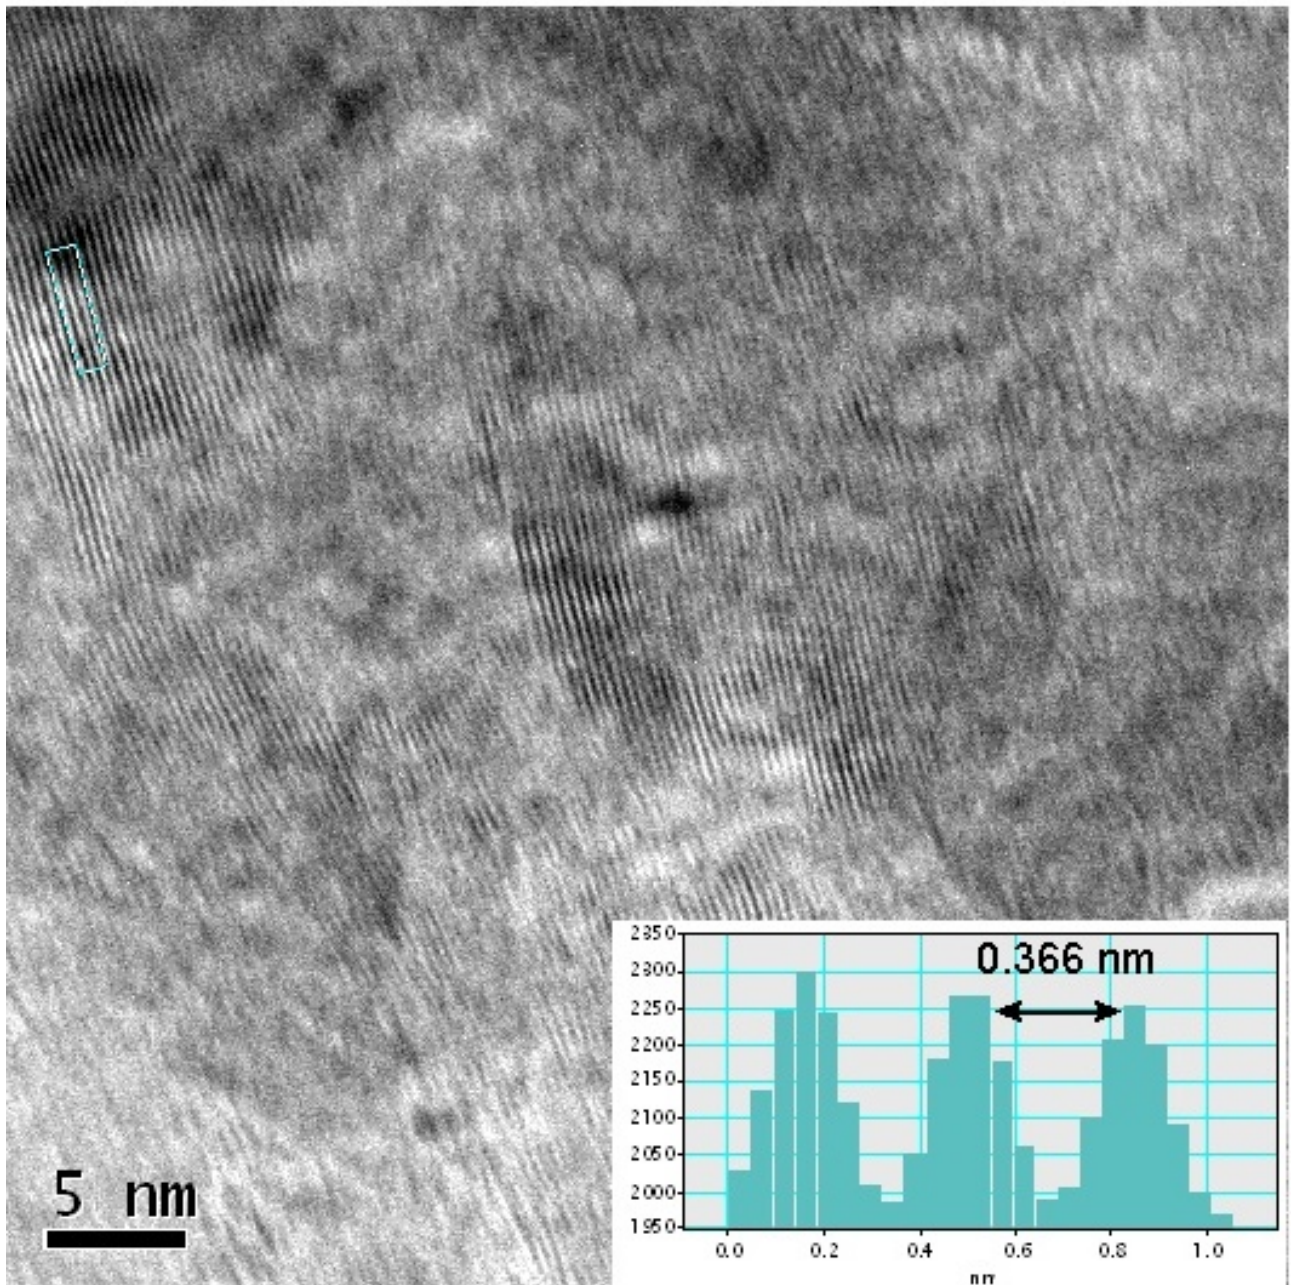

Figure S7. HRTEM of exfoliated h-BCN



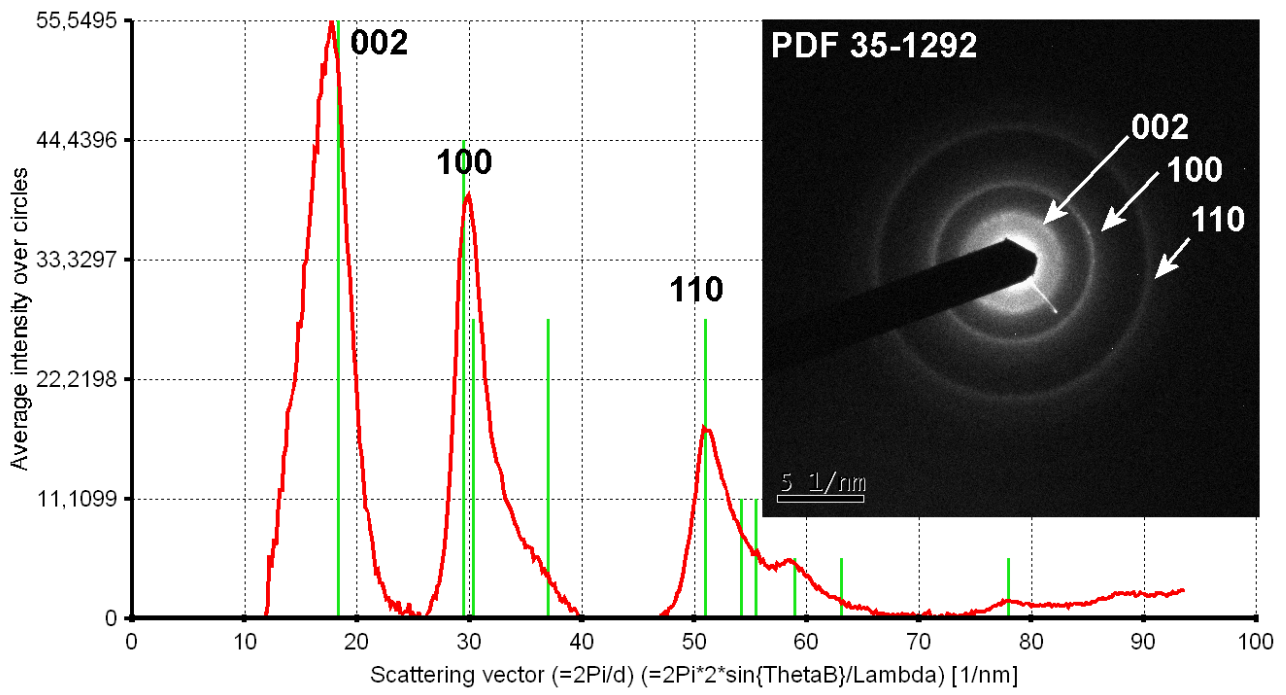

**Figure S8. SAED of exfoliated h-BCN**

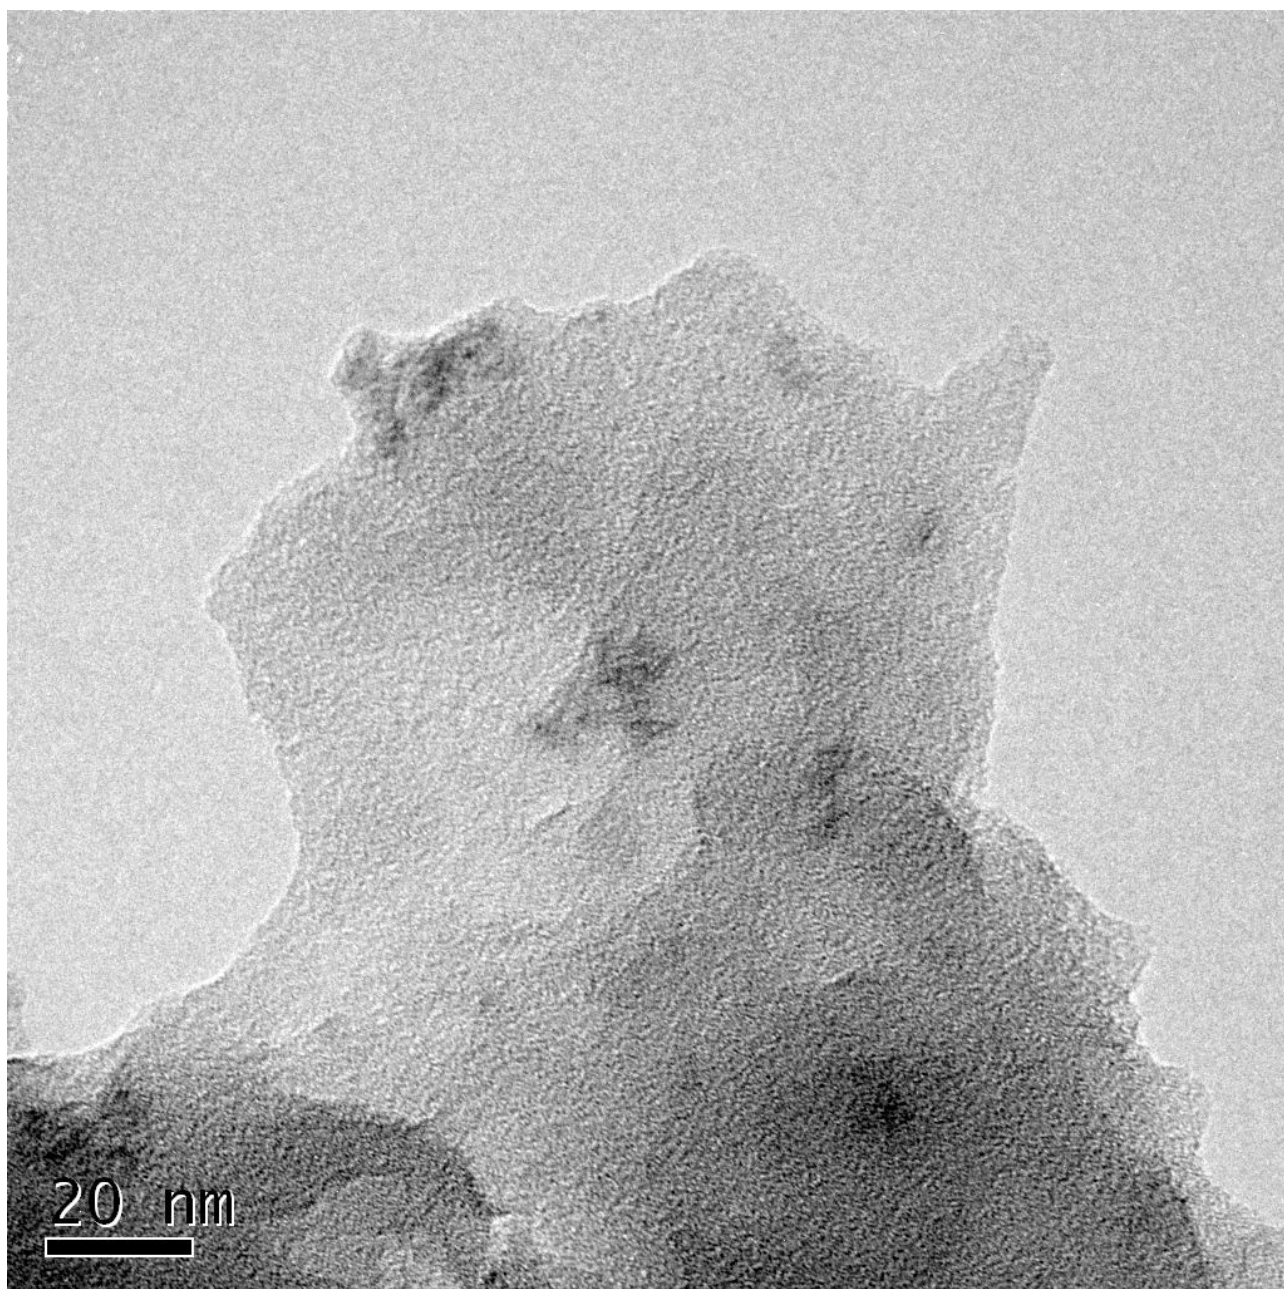

**Figure S9. TEM of exfoliated g-C<sub>3</sub>N<sub>4</sub>**

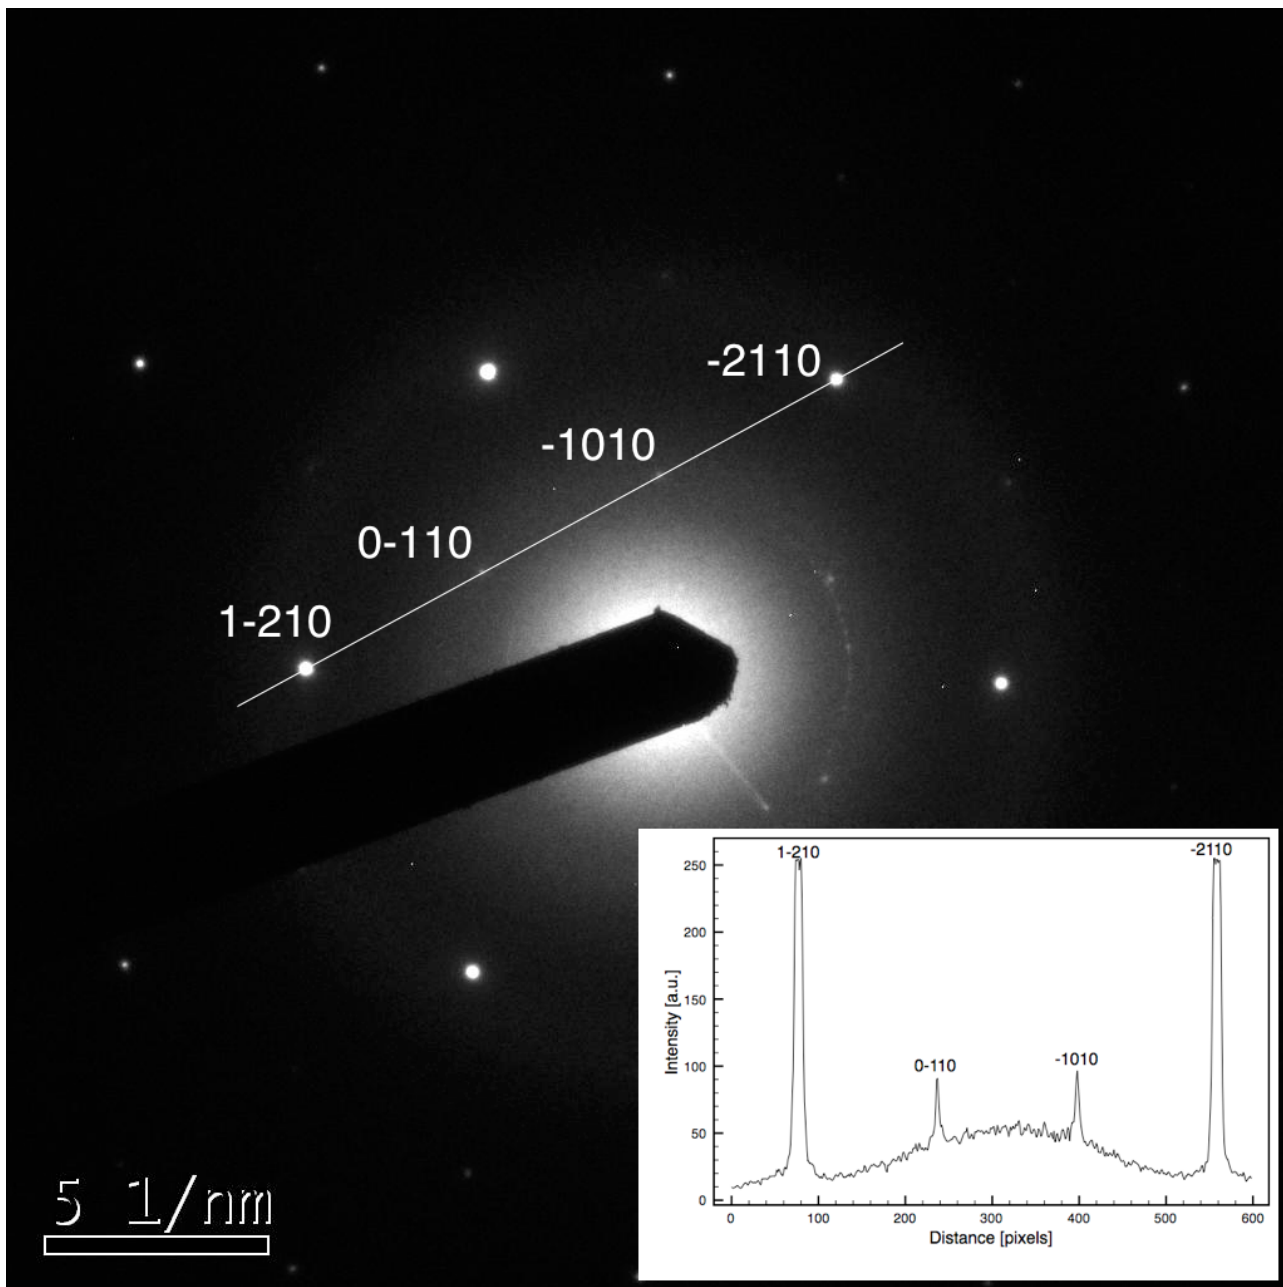

Figure S10. SAED of exfoliated g-C<sub>3</sub>N<sub>4</sub>
